# Supplementary material
Source: Springer Nature journal article supplement (https://www.springermedizin.de/resource/supplementary/12888_2013_1399_MOESM5_ESM.pdf/9480130)

### ANY BRAIN

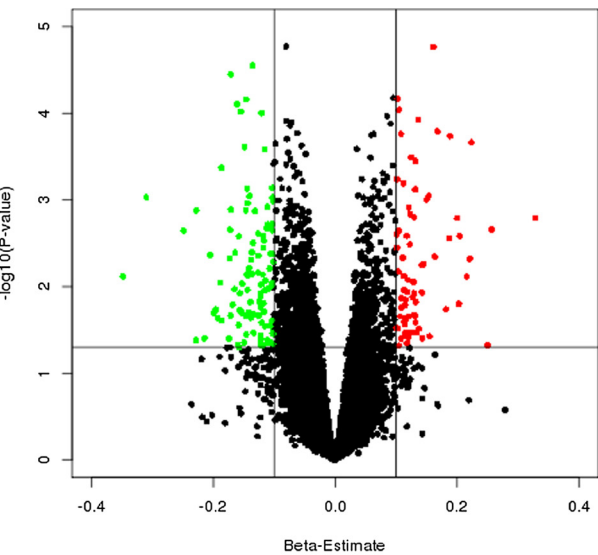

### PREFRONTAL CORTEX

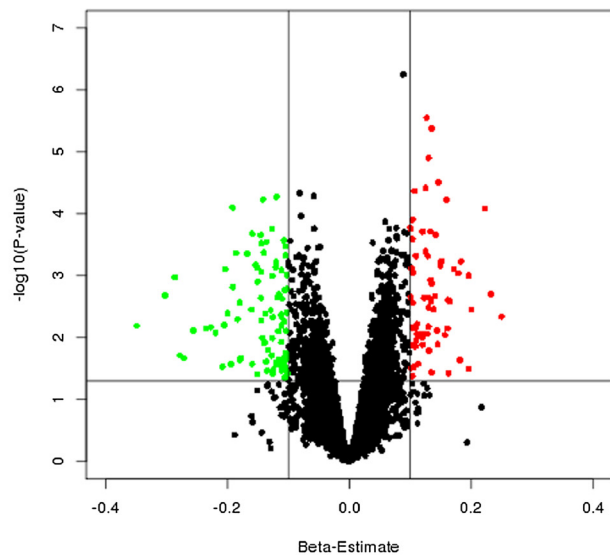

### HIPPOCAMPUS

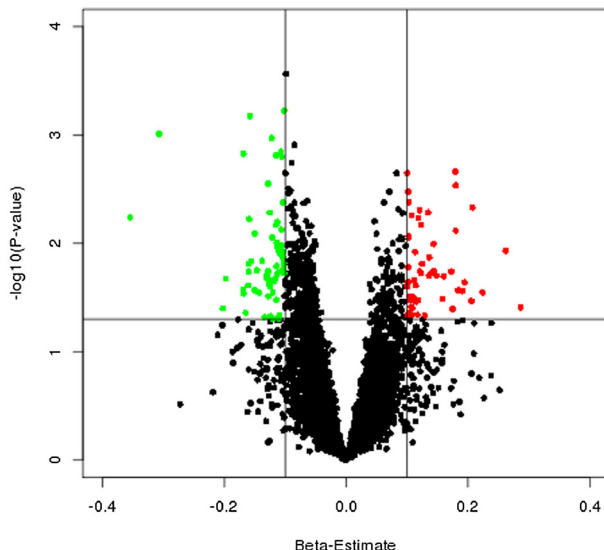

Supplement: MOESM5 [file 9480130]
